# Supplementary material
Source: Springer Nature journal article supplement (https://www.springermedizin.de/resource/supplementary/12875_2013_1097_MOESM1_ESM.pdf/9435796)
Supplement: MOESM1 [file 9435796]

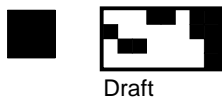

Draft

# GP registration form

## 1. Background information

Date:

|                      |                      |                      |
|----------------------|----------------------|----------------------|
| Day                  | Month                | Year                 |
| <input type="text"/> | <input type="text"/> | <input type="text"/> |

The patient's civil registration number:

|                      |                      |                      |                      |                      |                      |
|----------------------|----------------------|----------------------|----------------------|----------------------|----------------------|
| <input type="text"/> | <input type="text"/> | <input type="text"/> | <input type="text"/> | <input type="text"/> | <input type="text"/> |
|----------------------|----------------------|----------------------|----------------------|----------------------|----------------------|

Service offered: Tick only one box

☐ Service 0101☐ No service 0101

- the registration is finished if no service 0101

The patient is: Tick box if relevant

☐ Listed with another practice and is excluded

- the registration is finished

## 2. Problems presented

Problem(s) presented in the current consultation:

☐ No symptoms☐ Symptoms which: Tick relevant boxes

Cannot be attributed to a verifiable somatic disease or psychiatric disorder

☐

Please continue the registration

Can be attributed to a verifiable somatic disease

☐

Diagnosis: \_\_\_\_\_

Can be attributed to a verifiable psychiatric disorder (excl. P75)

☐

Diagnosis: \_\_\_\_\_

## 3. Course

Type of consultation: Tick only one box

☐ New episode☐ Recurrent episode☐ Preplanned control

Course of symptoms: Tick only one box

☐ Single episode (= $\leq$ 6 months)☐ Recurrent (= $\leq$ 6 months)☐ Long-lasting (>6 months)

## 4. Symptoms

Symptoms presented in the current consultation that cannot be attributed to a verifiable disease:

Symptoms within the past 6 months that have not been attributable to a verifiable disease:

| Specification: | Or<br>ICPC code      | Specification: | Or<br>ICPC code      |
|----------------|----------------------|----------------|----------------------|
| 1.             | <input type="text"/> | 1.             | <input type="text"/> |
| 2.             | <input type="text"/> | 2.             | <input type="text"/> |
| 3.             | <input type="text"/> | 3.             | <input type="text"/> |
| 4.             | <input type="text"/> | 4.             | <input type="text"/> |
| 5.             | <input type="text"/> | 5.             | <input type="text"/> |

## 5. Classification

Please tick the box below that best describes the patient's problem: Tick only one box

☐ A symptom diagnosis of 'multiple symptoms'

- at least 3 symptoms within the past 6 months

- the symptoms have not been attributable to a verifiable somatic disease or psychiatric disorder

☐ A symptom diagnosis of 'fear of a disease' (any A-Y chapter in the ICPC)

- the patient's problem is primarily fear of a disease and not the specific symptom

☐ Other symptom diagnoses (any A-Y chapter in the ICPC)

- single symptoms expected to resolve spontaneously

- symptoms in need of further assessment

☐ A somatoform disorder (P75)

- multiple, recurrent and changing somatic symptoms despite negative test results and doctor's reassurance

- symptom duration &gt;6 months

GHI

F

P
